# Supplementary material
Source: Springer Nature journal article supplement (https://www.springermedizin.de/resource/supplementary/12968_2011_1977_MOESM2_ESM.pdf/9581052)

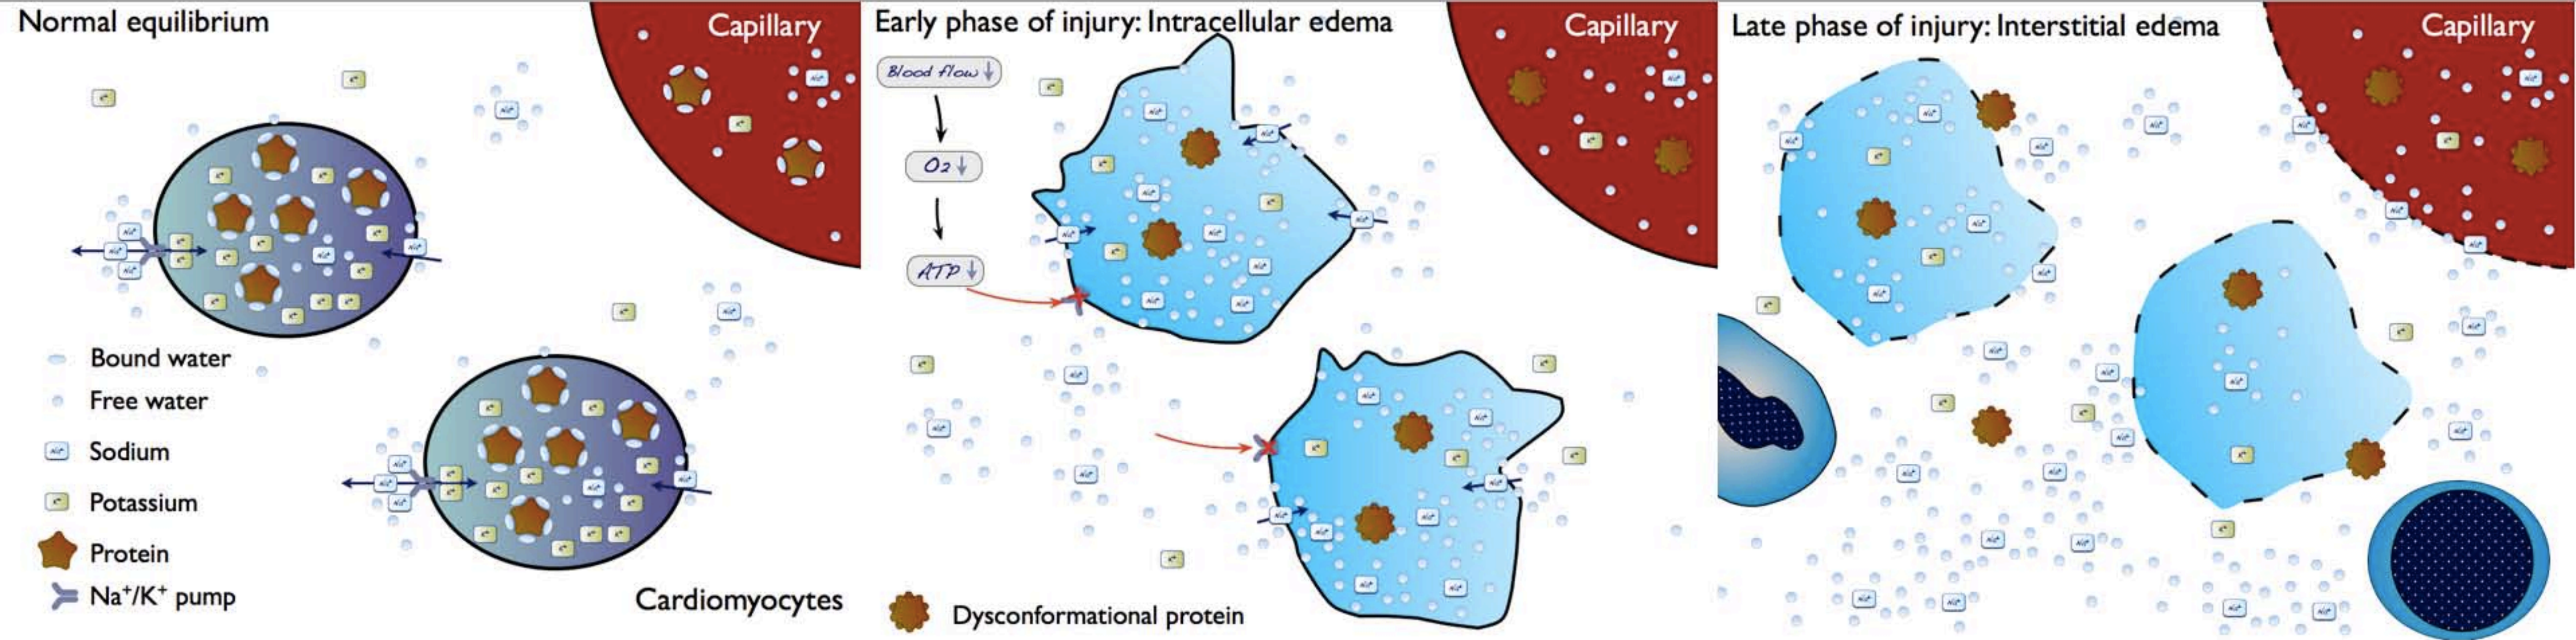

Supplement: MOESM2 [file 9581052]
